# Supplementary material for: The Effect of Chronic Intermittent Hypobaric Hypoxia on Sleep Quality and Melatonin Serum Levels in Chilean Miners
Source: PubMed Central journal article supplement (PMC8864145; doi:10.3389/fphys.2021.809360), 2022-02-09

Supplementary Figure 1: Nocturnal oximetry parameters according to altitude. (A) TE, number of events. (B) TTE, total time of events. (C) ATE, Average time per event. (D) ODI, Oxygen desaturation index of 4%. Data are presented as a box-and-whisker plot. Significant differences: \*  $p < 0.05$ , \*\*  $p < 0.01$ , \*\*\*  $p < 0.001$  compared to the population at 0 m.

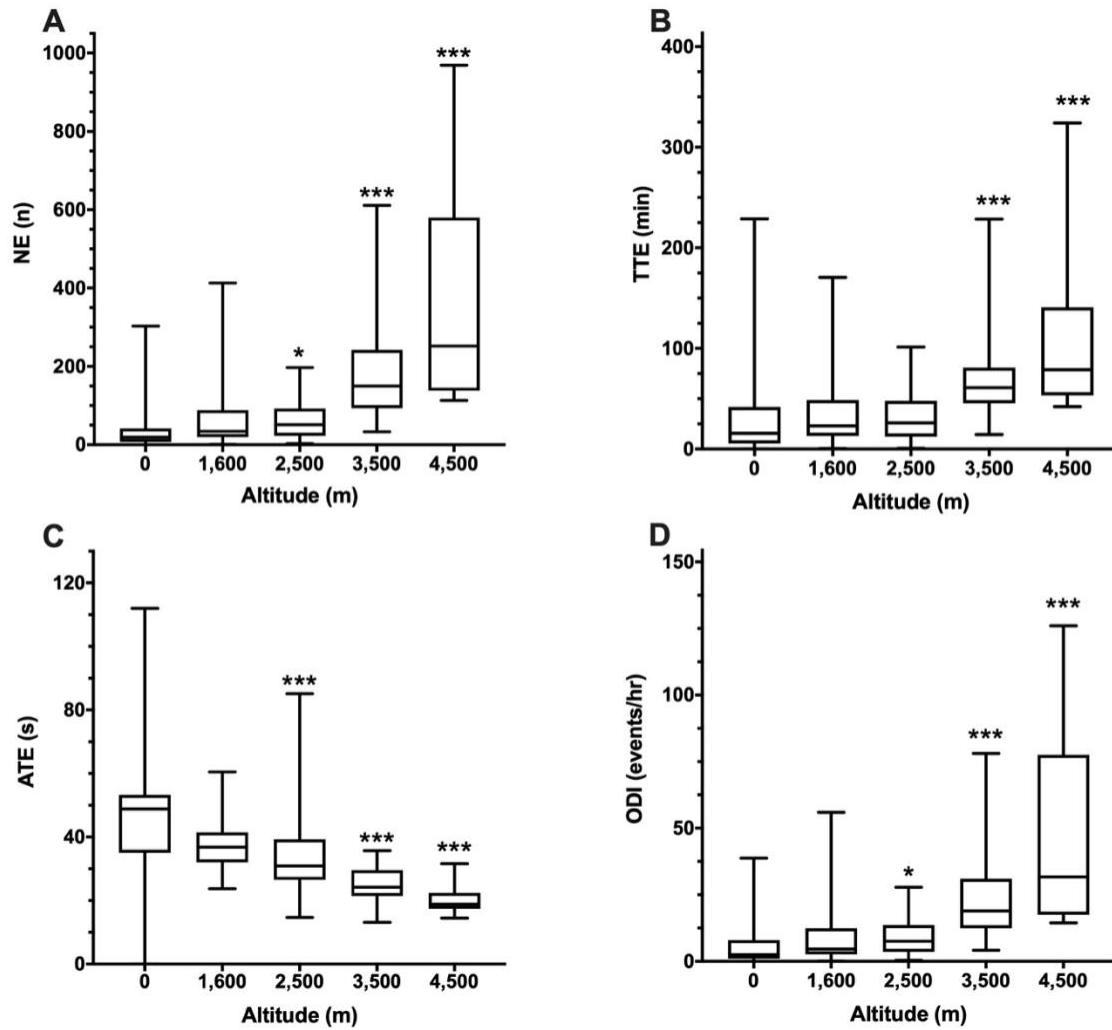

Supplement: Image_1.pdf [file Image_1.pdf]
